# Supplementary material for: Maternal Supplementation with Polyphenols and Omega-3 Fatty Acids during Pregnancy: Effects on Growth, Metabolism, and Body Composition of the Offspring
Source: Animals (Basel). 2020 Oct 22;10(11):1946. doi: 10.3390/ani10111946 (PMC7690598; doi:10.3390/ani10111946)
Supplement: Supplementary file 1 [file animals-10-01946-s001.xlsx]

## Sheet: S1a
	Table 1a. Ingredient composition, calculated analysis (g/kg, dry-matter basis) and fatty acid composition of experimental diets of sows .
		Sow
		C	T
	Phase	Gestation
	Ingredient
	Barley	234	299
	Wheat	300.1	192.5
	Wheat bran	245.5	300
	Cookie Flour	100	0
	Beet pulp	50	50
	Sunflower flour (28%)	31.5	68
	Soybean oil	7	0
	Linseed oil	0	40
	Sepiolite	0	18.1
	Salt	5	5
	Phosfate Monocalcium	2.5	2.5
	Calcium carbonate	16.5	17.5
	L-Lysine (500g/kg)	4.2	3.8
	L-Threonine	0.7	0.6
	Mineral and vitamin Premix	3	3
	Estimated analysis
	Dry Matter (DM)	910.71	910.31
	EM (Kcal/kg)	2910.4	2909.13
	Crude protein	122.8	123.4
	Crude fat	35.5	62.3
	Crude fiber	62.1	73
	Fatty acids composition (g/100 g total fatty acids)
	C14:0	0.5	0.2
	C14:1	0	0
	C16:0	20.6	11.8
	C16:1 n-9	0.2	0.2
	C16:1 n-7	0.9	0.2
	C17:0	0.5	0.2
	C17:1	0	0
	C18:0	3.7	3.2
	C18:1 n-9	19.3	18.4
	C18:1 n-7	4.7	3.1
	C18:2 n-6	41.5	32.3
	C18:3 n-3	4.1	29
	C20:0	0.3	0.3
	C20:1 n-9	0.9	0.4
	C20:2	0	0
	C20:5 n-3	0.2	0.1
	C22:4 n-6	0.1	0.1
	C22:5 n-3	1.2	0.3
	C22:6 n-3	1.2	0.2
	SFA	25.6	15.8
	MUFA	26	22.3
	PUFA	48.4	61.9
	SFA = sum of saturated fatty acids, MUFA = sum of monounsaturated fatty acids, PUFA = sum of polyunsaturated fatty acids.
	C= Control, T= Treated with Hydroxytyrosol and linseed oil

## Sheet: S1b
Table 1b. Analysis (g/kg, dry-matter basis) and fatty acid composition of diets of piglets.
	Offspring
	Starter	Growth
Phase	30-60 days-old	60-180 days-old
Estimated analysis
Dry Matter (DM)	896.4	897.3
Crude protein	180	120
Crude fat	56	35
Crude fiber	31.1	55.1
Nitrogen-free extracts (NFE)	583.6	630.8
Ash	45.7	56.4
Fatty acids composition (g/100 g total fatty acids)
C14:0	0.759668	0.571663
C14:1	0.247788	0.184132
C16:0	17.7471	18.4906
C16:1 n-9	0.214533	0.211835
C16:1 n-7	1.10764	0.83912
C17:0	0.353369	0.428054
C17:1	0.15362	0
C18:0	5.87008	3.49294
C18:1 n-9	24.1259	19.9144
C18:1 n-7	4.23895	3.99179
C18:2 n-6	38.6348	44.4548
C18:3 n-3	4.28109	3.35074
C20:0	0.339388	0.38538
C20:1 n-9	0.573443	0.798304
C20:2	0.194886	0
C20:5 n-3	0.21694	0.188196
C22:4 n-6	0.184269	0.298015
C22:5 n-3	0.43299	0.997368
C22:6 n-3	0.323537	1.4026
SFA	25.0696	23.3687
MUFA	30.6618	25.9396
PUFA	44.0736	50.6917
SFA = sum of saturated fatty acids, MUFA = sum of monounsaturated fatty acids, PUFA = sum of polyunsaturated fatty acids.
C= Control, T= Treated with Hydroxytyrosol and linseed oil

## Sheet: S2
Table 2. Body weight (mean Kg ± S.E.M.) in piglets born from sows treated or not with hydroxytyrosol and linseed oil during pregnancy (groups T and C, respectively) at 0, 15, 30, 60, 90, 120 ,150 and 180 days-old
		C									T									P value
	Days	Total			Females			Males			Total			Females			Males			Total	F vs M		C vs T		Treatment*Sex
																					C	T	F	M
	0	1.28511	±	0.0307338	1.20912	±	0.0648432	1.33296	±	0.026243	1.18782	±	0.0299119	1.16425	±	0.0411267	1.20878	±	0.0434072	*	*	NS	*	NS	NS
	15	3.35884	±	0.0950957	3.37079	±	0.101418	3.35187	±	0.140132	3.12829	±	0.100193	3.14605	±	0.150746	3.11053	±	0.136052	+	NS	NS	NS	NS	NS
	30	6.09243	±	0.180339	5.97143	±	0.205	6.16609	±	0.26428	6.295	±	0.205836	6.27711	±	0.294441	6.31289	±	0.29572	NS	NS	NS	NS	NS	NS
	60	13.7695	±	0.477664	13.0746	±	0.692135	14.1924	±	0.637827	14.6374	±	0.387983	14.4543	±	0.590537	14.8108	±	0.520401	NS	NS	NS	NS	NS	NS
	90	22.2222	±	0.921974	22.6429	±	1.39606	21.9545	±	1.26573	23.1579	±	0.95823	23.5	±	1.40831	22.7778	±	1.35941	NS	NS	NS	NS	NS	NS
	120	30.9389	±	1.30902	31.7	±	1.54288	30.4545	±	1.94872	32.425	±	1.01843	32.35	±	1.58649	32.5	±	1.36423	NS	NS	NS	NS	NS	NS
	150	35.8611	±	1.20172	36.2857	±	1.72812	35.5909	±	1.69064	37.2632	±	1.12219	37.05	±	1.70367	37.5	±	1.5298	NS	NS	NS	NS	NS	NS
	180	39.2188	±	1.59424	40.2857	±	2.22501	38.3889	±	2.32107	40.225	±	1.04092	40.35	±	1.67672	40.1	±	1.32665	NS	NS	NS	NS	NS	NS
		F = female; M = male; +:p <0.1;*:p <0.05;**p <0.01;***p <0.001; NS = non-significant

## Sheet: S3
	Table 3. Body measures (mean ± S.E.M.) in piglets born from sows treated or not with hydroxytyrosol and linseed oil during pregnancy (groups T and C, respectively) at 0, 15, 30, 60 and 180 days-old
				Control									Treated									P value
				Total			Females			Males			Total			Females			Males			Total	F vs M		C vs T		Treatment*Sex
																							C	T	F	M
	0 days	BPD (cm)		4.59773	±	0.0289872	4.51176	±	0.0580836	4.65185	±	0.0258035	4.56863	±	0.0233457	4.55	±	0.0300965	4.58519	±	0.0352863	NS	*	NS	NS	NS	NS
		ONL (cm)		12.0795	±	0.0933055	12	±	0.2011	12.1296	±	0.0868596	12.049	±	0.0819552	12	±	0.108514	12.0926	±	0.122408	NS	NS	NS	NS	NS	NS
		TL (cm)		22.8864	±	0.296145	22.8529	±	0.563544	22.9074	±	0.336562	22.9706	±	0.256833	22.8125	±	0.368374	23.1111	±	0.362342	NS	NS	NS	NS	NS	NS
		TC (cm)		23.6932	±	0.266732	23.1765	±	0.593998	24.0185	±	0.210956	23.6176	±	0.419988	24.2292	±	0.775519	23.0741	±	0.37903	NS	NS	NS	*	NS	*
		AC (cm)		18.7273	±	0.252605	18.2647	±	0.554258	19.0185	±	0.210956	17.8098	±	0.25076	18.0208	±	0.31777	17.6222	±	0.382276	*	NS	NS	**	NS	NS
	15 days	BW (g)		3.35884	±	0.0950957	3.37079	±	0.101418	3.35187	±	0.140132	3.12829	±	0.100193	3.14605	±	0.150746	3.11053	±	0.136052	+	NS	NS	NS	NS	NS
		BPD (cm)		5.74474	±	0.0416067	5.75714	±	0.0510487	5.7375	±	0.0595309	5.81842	±	0.0568063	5.83158	±	0.0939866	5.80526	±	0.0664354	NS	NS	NS	NS	NS	NS
		ONL (cm)		14.4474	±	0.109618	14.4643	±	0.185047	14.4375	±	0.138942	14.0526	±	0.118953	14	±	0.137862	14.1053	±	0.197125	*	NS	NS	NS	*	NS
		TL (cm)		31.5658	±	0.391123	32.2857	±	0.61509	31.1458	±	0.494058	31.1053	±	0.381916	31.0263	±	0.526316	31.1842	±	0.567402	NS	NS	NS	NS	NS	NS
		TC (cm)		33.7895	±	0.376511	34	±	0.370625	33.6667	±	0.560366	32.8158	±	0.401996	32.9211	±	0.625088	32.7105	±	0.521911	+	NS	NS	NS	NS	NS
		AC (cm)		26.9342	±	0.340577	27.3571	±	0.39373	26.6875	±	0.486979	26.6974	±	0.362021	26.8158	±	0.567402	26.5789	±	0.464001	NS	NS	NS	NS	NS	NS
	30 days	BPD (cm)		6.27568	±	0.0571345	6.23571	±	0.0642857	6.3	±	0.0838783	6.41892	±	0.0539488	6.35263	±	0.0766127	6.48889	±	0.0744869	+	NS	NS	NS	NS	NS
		ONL (cm)		17.2838	±	0.137738	17	±	0.128388	17.4565	±	0.201067	17.5395	±	0.164811	17.3947	±	0.221567	17.6842	±	0.245457	NS	+	NS	NS	NS	NS
		TL (cm)		40.2703	±	0.493043	40.6786	±	0.561119	40.0217	±	0.720588	37.6892	±	0.591275	38.3421	±	0.670005	37	±	0.982693	**	NS	NS	*	*	NS
		TC (cm)		41.3784	±	0.477499	41.8214	±	0.443535	41.1087	±	0.721601	41.8684	±	0.540561	42	±	0.690368	41.7368	±	0.850153	NS	NS	NS	NS	NS	NS
		AC (cm)		34.4189	±	0.54954	33.8929	±	0.604876	34.7391	±	0.806881	35	±	0.487029	34.7895	±	0.699118	35.2105	±	0.69387	NS	NS	NS	NS	NS	NS
	60 days	BPD (cm)		7.26486	±	0.0634608	7.22857	±	0.0867158	7.28696	±	0.0885331	7.49189	±	0.0445832	7.52778	±	0.0614666	7.45789	±	0.0650307	**	NS	NS	NS	**	NS
		ONL (cm)		21.473	±	0.263485	21.0357	±	0.253894	21.7391	±	0.38866	22.1757	±	0.198735	22.0556	±	0.304886	22.2895	±	0.263012	*	NS	NS	NS	*	NS
		TL (cm)		52.4595	±	0.943879	52.25	±	1.59648	52.587	±	1.19438	52.4595	±	0.740268	52.6389	±	1.06627	51.6842	±	1.04519	NS	NS	NS	+	NS	NS
		TC (cm)		53.0946	±	0.659829	52.6786	±	0.953027	53.3478	±	0.900941	55.2027	±	0.77896	55.2222	±	1.11307	55.1842	±	1.12013	*	NS	NS	NS	NS	NS
		AC (cm)		50.9324	±	0.806357	50.2143	±	1.44374	51.3696	±	0.968994	53.5378	±	0.813829	53.05	±	0.989099	54	±	1.29608	*	NS	NS	NS	NS	NS
	180 days	BPD (cm)		9.09412	±	0.0893072	9.1	±	0.09759	9.09	±	0.140198	9.12	±	0.0851006	9.08	±	0.130639	9.16	±	0.114698	NS	NS	NS	NS	NS	NS
		ONL (cm)		27.0882	±	0.312824	27.7143	±	0.40616	26.65	±	0.408588	27	±	0.211511	27	±	0.298142	27	±	0.316228	NS	+	NS	NS	NS	NS
		TL (cm)		84.3529	±	1.15425	84.7857	±	1.27175	84.05	±	1.80193	85.625	±	0.83262	86.35	±	1.19269	84.9	±	1.17804	NS	NS	NS	NS	NS	NS
		TC (cm)		76.2647	±	1.28989	76.05	±	1.61495	76.5714	±	2.27153	78.875	±	0.93603	79.55	±	1.24153	78.2	±	1.43411	NS	NS	NS	NS	NS	NS
		AC (cm)		74.3529	±	1.77128	74.1429	±	3.05254	74.5	±	2.26446	77.1	±	1.28227	77.7	±	1.95391	76.5	±	1.74483	NS	NS	NS	NS	NS	NS
			BPD = biparietal diameter; ONL = occipito-nasal length; TL = trunk lenght; TC = trunk circumference; AC = abdominal circumference; F = female; M = male; +:p <0.1;*:p <0.05;**p <0.01;***p <0.001; NS = non-significant

## Sheet: S4
	Table 2. Changes over time in mean plasma concentrations (± S.E.M.) for main metabolic parameters in piglets born from sows treated or not with hydroxytyrosol and linseed oil during pregnancy (groups T and C, respectively).
	Metabolite	Day	Control									Treated									P value
			Total			Females			Males			Total			Females			Males			Total	F vs M		C vs T		Treatment* Sex
																						C	T	F	M
	GLU (mg/dl)	60	100	±	4.95404	93.4286	±	6.38024	104.182	±	6.945	99	±	5.62811	92.5	±	6.74007	105	±	8.66827	NS	NS	NS	NS	NS	NS
		120	97.4444	±	2.64108	94.7143	±	3.32891	99.1818	±	3.7943	92.05	±	2.2612	91	±	3.09839	93.1	±	3.42685	NS	NS	NS	NS	NS	NS
		150	105	±	4.1377	105.833	±	9.07897	104.4	±	4.25363	97.3158	±	2.12484	98	±	2.71211	96.5556	±	3.48055	NS	NS	NS	NS	NS	NS
		180	99.3	±	2.86964	97.7143	±	4.61733	100.5	±	3.81881	99.4	±	3.31297	102.2	±	5.89501	96.6	±	3.13829	NS	NS	NS	NS	NS	NS
	FRUC (mg/dl)	60	309	±	14.5236	337.857	±	15.3148	290.636	±	20.2611	254	±	16.3698	272.75	±	27.7217	238.444	±	18.5847	*	NS	NS	+	+	NS
		120	249.667	±	4.70572	246.429	±	6.97566	251.727	±	21.476	231.05	±	6.16504	231.9	±	9.73019	230.2	±	8.10185	*	NS	NS	NS	*	NS
		150	234	±	5.47359	242.5	±	8.17211	235	±	7.43565	225	±	4.95231	226.3	±	7.44021	228.333	±	6.85768	+	NS	NS	NS	NS	NS
		180	235.471	±	4.84398	230.714	±	7.83069	238.8	±	6.2695	222	±	5.0401	225	±	6.64329	220	±	7.85706	+	NS	NS	NS	+	NS
	CHO (mg/dl)	60	107.228	±	5.40684	101.043	±	6.55863	111.164	±	7.80486	96.0176	±	3.79394	88.5375	±	4.71422	102.667	±	5.03477	NS	NS	+	NS	NS	NS
		120	111.017	±	2.8533	101.9	±	3.06501	116.818	±	3.22583	101.205	±	1.88236	96.96	±	1.93432	105.45	±	2.68598	*	*	*	NS	*	NS
		150	109	±	2.33	105.8	±	5.92612	109.36	±	4.76357	99.5	±	2.3	96.41	±	2.26045	103.36	±	3.31239	*	NS	+	+	NS	NS
		180	106	±	2.9756	100.029	±	3.15487	111.23	±	4.04648	96.95	±	3.13351	93.41	±	7.02582	100.49	±	4.98785	*	+	NS	NS	+	NS
	HDL (mg/dl)	60	31.0611	±	1.4522	30.5857	±	2.07748	31.3636	±	2.0482	28.8294	±	1.43537	25.65	±	2.22068	31.6556	±	1.35135	NS	NS	*	NS	NS	NS
		120	42.3611	±	0.953499	39.9143	±	1.1732	43.9182	±	1.1748	39.31	±	0.682522	39.33	±	0.835471	39.29	±	1.1264	*	*	NS	NS	*	+
		150	43.76	±	1.4	42.5	±	3.28634	44.39	±	1.42091	38.9833	±	0.89	38.96	±	1.40572	39.0125	±	2.61858	*	*	NS	NS	NS	NS
		180	38.2294	±	1.12684	34.6571	±	1.27089	40.73	±	1.18172	35.27	±	1.1145	34.06	±	1.19557	36.48	±	1.86808	*	**	NS	NS	+	NS
	LDL (mg/dl)	60	78.2222	±	5.09561	71.8286	±	6.56091	82.2909	±	7.179	63.1588	±	2.98452	56.6375	±	3.83778	68.9556	±	3.64265	*	NS	*	+	NS	NS
		120	66.3722	±	2.59581	59.5	±	3.09869	70.7455	±	3.18754	59.65	±	1.96567	58.28	±	2.58607	61.02	±	3.03468	*	*	NS	NS	*	NS
		150	64.7357	±	3.01	58.62	±	3.58893	68.1333	±	3.91702	57.2333	±	1.96294	55.43	±	2.63177	59.4875	±	2.9354	*	NS	NS	NS	0.400182	NS
		180	73.1765	±	3.23039	67.9	±	2.85115	76.87	±	4.90544	64.825	±	2.46976	63.2	±	3.41848	66.45	±	3.67173	*	NS	NS	NS	NS	NS
	TG (mg/dl)	60	50.2778	±	5.80951	33	±	5.34077	61.2727	±	7.20491	69.8235	±	4.7405	71.125	±	7.264	68.6667	±	6.59545	*	*	NS	**	NS	+
		120	63.8333	±	4.88779	50.2857	±	4.79938	72.4545	±	6.20903	59.85	±	4.13539	55.5	±	2.68845	64.2	±	7.79573	NS	*	NS	NS	NS	NS
		150	52.4375	±	2.55109	46.3333	±	4.69515	56.1	±	2.45606	46.7368	±	2.77293	46	±	3.26599	47.5556	±	4.79905	NS	+	NS	NS	NS	NS
		180	46.3	±	2.83355	41.1429	±	2.57671	50	±	4.19259	49.85	±	3.50959	53	±	6.03876	46.7	±	3.65164	NS	+	NS	+	NS	NS
	NEFA (mmol/l)	60	0.42	±	0.0236705	0.425714	±	0.0175739	0.424545	±	0.037956	0.43	±	0.0371113	0.425	±	0.0528813	0.48	±	0.0533854	NS	NS	NS	NS	NS	NS
		120	0.488889	±	0.0189235	0.441429	±	0.0185714	0.519091	±	0.0250982	0.5135	±	0.0203169	0.556	±	0.0323247	0.471	±	0.0172208	*	*	*	*	NS	**
		150	0.366875	±	0.0186626	0.39	±	0.0267083	0.353	±	0.0296292	0.377895	±	0.0209706	0.407	±	0.0270411	0.345556	±	0.0221805	NS	NS	NS	NS	NS	*
		180	0.570588	±	0.0457492	0.594286	±	0.0741574	0.554	±	0.0607033	0.517	±	0.0379688	0.474	±	4.28043	0.56	±	4.51116	NS	NS	NS	NS	NS	NS
	UREA (mg/dl)	60	25.3333	±	1.77307	24.1429	±	3.12005	26.0909	±	2.2093	24.3529	±	1.57867	25.25	±	2.29713	23.5556	±	2.26759	NS	NS	NS	NS	NS	NS
		120	26.3333	±	1.91826	20.7143	±	1.6578	29.9091	±	2.42882	21.55	±	0.98802	22.4	±	1.80862	20.7	±	0.830662	*	*	NS	NS	**	**
		150	29.125	±	1.85938	28.1667	±	3.43915	29.7	±	2.27572	28.8421	±	2.16871	27.4	±	2.86046	30.4444	±	3.39162	NS	NS	NS	NS	NS	NS
		180	29	±	2.42232	21	±	3.5051	34.6	±	1.8809	27.9	±	3.13881	32.2	±	5.32249	23.6	±	3.02655	NS	**	NS	NS	**	NS
	HP (mg/dl)	60	55.6	±	3.25392	59.4429	±	3.15239	53.1545	±	4.91138	46.8235	±	4.7421	51.925	±	7.59938	42.2889	±	5.87992	NS	NS	NS	NS	NS	NS
		120	37.7389	±	2.68883	38.3	±	4.36452	37.3818	±	3.57854	35.76	±	2.44196	35.27	±	4.33518	36.25	±	2.51609	NS	NS	NS	NS	NS	NS
		150	42.9062	±	4.56	42.2167	±	9.03698	43.32	±	5.31499	47.2105	±	3.77	47.71	±	5.95139	46.6556	±	4.81309	NS	NS	NS	NS	NS	NS
		180	44.4294	±	3.69205	43.5	±	5.82548	45.08	±	5.02449	50.995	±	4.19547	51.59	±	7.02582	50.4	±	4.98785	NS	NS	NS	NS	NS	NS
	LAC (mg/dl)	60	48.7833	±	5.1544	41.5429	±	9.34829	53.3909	±	5.92289	44.6324	±	5.55142	40.54	±	6.49002	48.27	±	8.95263	NS	NS	NS	NS	NS	NS
		120	30.1072	±	2.64299	27.2771	±	3.52831	31.9082	±	3.72087	21.6	±	3.61396	22.67	±	4.76631	28.608	±	5.51984	NS	NS	NS	NS	NS	NS
		150	44.3275	±	6.95141	37.91	±	8.88419	48.178	±	9.9074	36.9311	±	4.78881	37.582	±	7.72667	36.2078	±	5.8463	NS	NS	NS	NS	NS	NS
		180	52.5641	±	4.74091	47.5	±	7.08251	56.109	±	6.41313	48.9795	±	4.61664	52.202	±	6.37111	45.757	±	6.86227	NS	NS	NS	NS	NS	NS
	BHB (mmol/l)	60	0.351111	±	0.0302051	0.338571	±	0.0581635	0.359091	±	0.0350702	0.321765	±	0.0367747	0.28375	±	0.0388191	0.355556	±	0.0602797	NS	NS	NS	NS	NS	*
		120	0.197222	±	0.02	0.212857	±	0.0381547	0.187273	±	0.0126556	0.2535	±	0.0362177	0.265	±	0.0494694	0.242	±	0.0553333	NS	NS	NS	NS	NS	NS
		150	0.315625	±	0.0340584	0.331667	±	0.0489501	0.306	±	0.0476142	0.297368	±	0.0332705	0.362	±	0.0451122	0.225556	±	0.0385901	NS	NS	*	NS	NS	*
		180	0.322941	±	0.0299603	0.33	±	0.0516859	0.318	±	0.0382041	0.29	±	0.026611	0.341	±	0.0438292	0.228	±	0.018962	NS	NS	*	NS	+	NS
	GLU = glucose; FRU = fructosamine; CHO = cholesterol; HDL = high density lipoprotein cholesterol; LDL = low density lipoprotein cholesterol; TG = triglycerides; NEFA = non-esterified fatty acids; HP = haptoglobin; LAC = lactate; BHB = B-hydroxybutyrate. F = female; M = male; +:p <0.1;*:p <0.05;**p <0.01;***p <0.001; NS = non-significant

## Sheet: S5
	Table S5. Differences in fatty acid composition (g/100g ± S.E.M.) and desaturase activity in outer layer of the subcutaneous fat between piglets born from sows treated or not with hydroxytyrosol and linseed oil during pregnancy (groups T and C, respectively) at 60 days-old
		Control									Treated									P value
		Total			Females			Males			Total			Females			Males			Total	F vs M		C vs T		Treatment* Sex
																					C	T	F	M
	C14:0	1.19279	±	0.0371569	1.25723	±	0.0594571	1.15178	±	0.0453696	1.15716	±	0.0221141	1.11409	±	0.0337114	1.19546	±	0.0239597	NS	NS	+	+	NS	NS
	C16:0	20.493	±	0.196837	20.0893	±	0.365811	20.7499	±	0.199293	20.457	±	0.162067	20.3529	±	0.263991	20.5495	±	0.206755	NS	NS	NS	NS	NS	NS
	C16:1n9	0.397113	±	0.0149271	0.430383	±	0.024292	0.37594	±	0.0167111	0.355021	±	0.0119763	0.383344	±	0.0131291	0.329846	±	0.0154736	*	+	*	NS	+	NS
	C16:1n7	4.00354	±	0.207676	4.44729	±	0.209576	3.72114	±	0.28758	3.39443	±	0.125778	3.28109	±	0.190802	3.49519	±	0.169568	*	+	NS	**	NS	NS
	C17:0	0.397767	±	0.0275554	0.413907	±	0.0322101	0.387497	±	0.0410972	0.341637	±	0.0222261	0.354128	±	0.0392258	0.330534	±	0.0252335	NS	NS	NS	NS	NS	NS
	C17:1	0.475491	±	0.0339272	0.510746	±	0.0271457	0.453056	±	0.0528321	0.410408	±	0.0226148	0.410596	±	0.0403905	0.41024	±	0.0257527	NS	NS	NS	+	NS	NS
	C18:0	6.62562	±	0.355193	5.72654	±	0.304611	7.19776	±	0.480996	7.36094	±	0.211345	7.58553	±	0.303595	7.1613	±	0.29405	+	*	NS	**	NS	NS
	C18:1n9	37.7042	±	0.783208	38.1011	±	0.809623	37.4517	±	1.19989	37.5228	±	0.566838	37.9889	±	0.61255	37.1085	±	0.936155	NS	NS	NS	NS	NS	NS
	C18:1n7	2.88446	±	0.266516	2.82076	±	0.347963	2.934	±	0.406742	3.60513	±	0.457384	2.49679	±	0.312362	4.59032	±	0.675726	NS	NS	*	NS	+	*
	C18:2n6	21.6274	±	0.461894	22.7913	±	0.74097	20.8867	±	0.492731	21.8663	±	0.571598	22.5161	±	0.95698	21.2887	±	0.658322	NS	*	NS	NS	NS	NS
	C18:3n6	0.014	±	0.00103708	0.013	±	0.0014436	0.015	±	0.00145899	0.014	±	0.00149819	0.016	±	0.00253337	0.013	±	0.00169112	NS	NS	NS	NS	NS	NS
	C18:3n3	1.71735	±	0.0346359	1.78278	±	0.0601324	1.67572	±	0.0388698	1.84895	±	0.0504514	1.88587	±	0.0844299	1.81613	±	0.061525	*	NS	NS	NS	+	NS
	C18:4n3	0.086004	±	0.00441353	0.0974034	±	0.0057357	0.0774544	±	0.00461721	0.0873756	±	0.00343746	0.0863272	±	0.00171248	0.0881911	±	0.00612262	NS	*	NS	+	NS	*
	C20:1n9	0.701795	±	0.0125254	0.664041	±	0.00884144	0.725821	±	0.0160671	0.708791	±	0.0194445	0.685662	±	0.0215087	0.72935	±	0.030923	NS	*	NS	NS	NS	NS
	C20:3n6	0.324288	±	0.0118288	0.346975	±	0.0202673	0.309851	±	0.0133717	0.310955	±	0.0117963	0.307538	±	0.0142973	0.313992	±	0.0190853	NS	NS	NS	NS	NS	NS
	C20:4n6	0.159079	±	0.00498878	0.151747	±	0.00629761	0.163744	±	0.00696373	0.188969	±	0.00665545	0.185566	±	0.0109659	0.191995	±	0.00844851	**	NS	NS	*	*	NS
	C20:5n3	0.0392645	±	0.000851383	0.0395181	±	0.00136391	0.0391032	±	0.00113993	0.0428249	±	0.00120237	0.0415584	±	0.00154843	0.0439507	±	0.00180555	+	NS	NS	NS	*	NS
	C22:4n6	0.0695758	±	0.0027749	0.0708713	±	0.00506572	0.0687513	±	0.0033834	0.0628648	±	0.00218899	0.0587507	±	0.00318066	0.0665218	±	0.00258478	+	NS	+	+	NS	NS
	C22:5n3	0.114813	±	0.00578887	0.119299	±	0.00950592	0.111959	±	0.00752492	0.125217	±	0.00447311	0.111535	±	0.00339566	0.13738	±	0.00522772	NS	NS	**	NS	*	+
	C22:6n3	0.123324	±	0.00603622	0.123081	±	0.0119133	0.123478	±	0.00686744	0.140325	±	0.00459094	0.140672	±	0.00766346	0.140017	±	0.0058241	*	NS	NS	NS	+	NS
	SFA	28.7092	±	0.398458	27.487	±	0.397452	29.4869	±	0.475192	29.3167	±	0.322023	29.4066	±	0.482135	29.2368	±	0.457447	NS	**	NS	*	NS	NS
	MUFA	43.002	±	0.379526	42.527	±	0.740902	43.3043	±	0.409388	42.6022	±	0.462198	41.9653	±	0.661719	43.1683	±	0.617533	NS	NS	NS	NS	NS	NS
	PUFA	24.1619	±	0.510221	25.4156	±	0.820419	23.3641	±	0.550917	24.5464	±	0.627491	25.2063	±	1.05606	23.9597	±	0.727087	NS	*	NS	NS	NS	NS
	UI	0.992369	±	0.00909333	1.01809	±	0.0118091	0.976004	±	0.0103881	0.992851	±	0.00918214	0.998271	±	0.0158913	0.988034	±	0.0107672	NS	*	NS	NS	NS	NS
	MUFA/SFA	1.50182	±	0.0212933	1.54942	±	0.0369551	1.47153	±	0.0224478	1.45559	±	0.0211276	1.42844	±	0.0224659	1.47972	±	0.0337493	NS	+	NS	*	NS	NS
	∑n3	2.09091	±	0.0450098	2.16458	±	0.078727	2.04403	±	0.0519999	2.24321	±	0.0557074	2.26294	±	0.0939461	2.22567	±	0.0691185	*	NS	NS	NS	*	NS
	∑n6	22.1944	±	0.471494	23.3741	±	0.759555	21.4436	±	0.503183	22.4435	±	0.577013	23.084	±	0.970729	21.8741	±	0.662392	NS	*	NS	NS	NS	NS
	∑n3/∑n6	10.6254	±	0.108228	10.8226	±	0.227575	10.4999	±	0.0936054	10.0076	±	0.0864208	10.2042	±	0.130111	9.83295	±	0.0833163	***	NS	*	*	***	NS
	D9	0.605489	±	0.00627542	0.622152	±	0.00606108	0.594885	±	0.00816149	0.595046	±	0.00396228	0.596297	±	0.00428271	0.593933	±	0.00668698	NS	*	NS	**	NS	NS
	DI	6.54544	±	0.332074	7.26412	±	0.398851	6.08811	±	0.438446	5.66193	±	0.179276	5.39032	±	0.210316	5.90336	±	0.267453	*	+	NS	**	NS	NS
	DN3	0.022931	±	0.000466429	0.022281	±	0.000960458	0.0233446	±	0.000457152	0.0232333	±	0.000456021	0.0221204	±	0.000431599	0.0242226	±	0.000617064	NS	NS	*	NS	NS	*
	DN6	0.00742831	±	0.000307393	0.00670586	±	0.000383379	0.00788805	±	0.000390365	0.00871099	±	0.000340625	0.00830154	±	0.000485026	0.00907495	±	0.000469213	**	+	NS	*	+	NS
	SFA = sum of saturated fatty acids; MUFA = sum o monounsaturated fatty acids; PUFA = sum of polyunsaturated fatty acids; UI = unsaturation index; D9 = activity of ∆9 desaturase activity; DI = desaturation index; DN3 total activity of the desaturases of n3; DN6 = total activity of the desaturases of n6; F= female; M = male; +:p <0.1;*:p <0.05;**p <0.01;***p <0.001; NS = non-significant

## Sheet: S6
	Table S6. Differences in fatty acid composition (g/100g ± S.E.M.) and desaturase activity in the inner layer of the subcutaneous fat between piglets born from sows treated or not with hydroxytyrosol and linseed oil during pregnancy (groups T and C, respectively) at 60 days-old
		Control									Treated									P value
		Total			Females			Males			Total			Females			Males			Total	F vs M		C vs T		Treatment* Sex
																					C	T	F	M
	C14:0	1.19922	±	0.0422162	1.25644	±	0.0678543	1.1628	±	0.0534681	1.12846	±	0.0240878	1.09737	±	0.0397243	1.15955	±	0.0251497	NS	NS	NS	+	NS	NS
	C16:0	21.2208	±	0.242736	20.8458	±	0.491033	21.4594	±	0.239169	20.6929	±	0.18149	20.2557	±	0.216573	21.1301	±	0.199119	+	NS	*	NS	NS	NS
	C16:1n9	0.435422	±	0.0169623	0.472497	±	0.029335	0.411829	±	0.0181296	0.367624	±	0.0120414	0.385744	±	0.0121495	0.349504	±	0.0194932	**	+	NS	*	*	NS
	C16:1n7	3.70481	±	0.185036	4.07812	±	0.201441	3.46725	±	0.255419	3.12308	±	0.147427	3.20238	±	0.234176	3.04378	±	0.191086	*	NS	NS	*	NS	NS
	C17:0	0.41444	±	0.0270063	0.437742	±	0.0309872	0.399612	±	0.0400715	0.359712	±	0.0243829	0.355549	±	0.0384329	0.363876	±	0.0326486	NS	NS	NS	NS	NS	NS
	C17:1	0.427774	±	0.0279722	0.453671	±	0.0251277	0.411295	±	0.0431937	0.395503	±	0.0232862	0.406017	±	0.0377245	0.384989	±	0.0294822	NS	NS	NS	NS	NS	NS
	C18:0	7.4735	±	0.323223	6.62709	±	0.321822	8.01211	±	0.420096	7.97558	±	0.264937	7.77517	±	0.394637	8.17599	±	0.365522	NS	*	NS	*	NS	NS
	C18:1n9	37.1763	±	0.43721	36.9137	±	0.750591	37.3435	±	0.556288	37.1038	±	0.477943	37.784	±	0.733129	36.4236	±	0.556152	NS	NS	NS	NS	NS	NS
	C18:1n7	2.53762	±	0.216819	2.22985	±	0.133688	2.73347	±	0.337768	2.8137	±	0.25901	2.44356	±	0.214132	3.18384	±	0.450016	NS	NS	NS	NS	NS	NS
	C18:2n6	22.0147	±	0.498783	23.2403	±	0.863851	21.2348	±	0.50074	22.402	±	0.615456	22.6652	±	0.900956	22.1387	±	0.889856	NS	*	NS	NS	NS	NS
	C18:3n6	0.0172378	±	0.00101858	0.0170425	±	0.00182095	0.0173621	±	0.00127128	0.0175653	±	0.00161277	0.0174646	±	0.00246945	0.0176659	±	0.00224638	NS	NS	NS	NS	NS	NS
	C18:3n3	1.72359	±	0.0373451	1.78841	±	0.0691677	1.68233	±	0.0401923	1.8842	±	0.0528902	1.8902	±	0.0792483	1.8782	±	0.0754861	NS	NS	NS	NS	*	NS
	C18:4n3	0.0794991	±	0.00438876	0.0836286	±	0.00550281	0.0770214	±	0.00628098	0.0813601	±	0.00356528	0.0865593	±	0.00279532	0.0768109	±	0.00595578	NS	NS	NS	NS	NS	NS
	C20:1n9	0.724751	±	0.00930969	0.698382	±	0.0128895	0.741531	±	0.0102598	0.744028	±	0.0169625	0.720176	±	0.0218761	0.767881	±	0.0243309	NS	*	NS	NS	NS	NS
	C20:3n6	0.309676	±	0.0117925	0.333451	±	0.0205488	0.294547	±	0.0129137	0.299337	±	0.0111722	0.307	±	0.0166938	0.291673	±	0.0154748	NS	NS	NS	NS	NS	NS
	C20:4n6	0.14851	±	0.00483237	0.142279	±	0.0065345	0.152475	±	0.00667937	0.188183	±	0.00707232	0.18774	±	0.0121035	0.188625	±	0.00823474	**	NS	NS	**	**	NS
	C20:5n3	0.0357515	±	0.000807766	0.0358262	±	0.00142911	0.0357039	±	0.0010172	0.0416005	±	0.00125733	0.0417375	±	0.00193462	0.0414635	±	0.00173987	**	NS	NS	*	**	NS
	C22:4n6	0.0962321	±	0.00426044	0.100726	±	0.00724719	0.0933727	±	0.0053233	0.0879072	±	0.00287831	0.082764	±	0.00393601	0.0930503	±	0.00352927	NS	NS	+	*	NS	NS
	C22:5n3	0.0874639	±	0.0126324	0.069139	±	0.0223078	0.0991253	±	0.0147967	0.114866	±	0.0133526	0.109193	±	0.0172204	0.121349	±	0.0219759	NS	NS	NS	NS	NS	NS
	C22:6n3	0.167672	±	0.00746189	0.173669	±	0.0158717	0.163856	±	0.00741366	0.186323	±	0.00637178	0.190452	±	0.010207	0.182193	±	0.00805875	+	NS	NS	NS	NS	NS
	SFA	30.3079	±	0.373796	29.167	±	0.539146	31.0339	±	0.37704	30.1566	±	0.387447	29.4838	±	0.495001	30.8295	±	0.518621	NS	*	+	NS	NS	NS
	MUFA	41.3019	±	0.426682	40.7681	±	0.839965	41.6416	±	0.455398	41.4247	±	0.484117	41.7395	±	0.678965	41.1098	±	0.717719	NS	NS	NS	NS	NS	NS
	PUFA	24.5177	±	0.544557	25.8131	±	0.954264	23.6934	±	0.549993	25.1093	±	0.671947	25.3839	±	0.987103	24.8347	±	0.969093	NS	+	NS	NS	NS	NS
	UI	0.981269	±	0.00914416	1.00626	±	0.014843	0.965364	±	0.00913431	0.992484	±	0.0100306	1.00226	±	0.0142417	0.982708	±	0.0141798	NS	*	NS	NS	NS	NS
	MUFA/SFA	1.36584	±	0.0205603	1.40127	±	0.0421246	1.3433	±	0.0191766	1.37689	±	0.023318	1.4181	±	0.0309701	1.33567	±	0.029763	NS	NS	+	NS	NS	NS
	∑n3	2.099	±	0.0452341	2.15301	±	0.0881233	2.06463	±	0.0492251	2.30069	±	0.0568256	2.31416	±	0.0825895	2.28722	±	0.0834644	NS	NS	NS	NS	*	NS
	∑n6	22.5864	±	0.510288	23.8338	±	0.885824	21.7926	±	0.512573	22.9949	±	0.624893	23.2602	±	0.91607	22.7297	±	0.902357	NS	*	NS	NS	NS	NS
	∑n3/∑n6	10.7708	±	0.135425	11.0904	±	0.208187	10.5675	±	0.154383	9.99677	±	0.127744	10.0515	±	0.174822	9.942	±	0.196257	***	+	NS	**	*	NS
	D9	0.587616	±	0.00459858	0.598615	±	0.00677447	0.580617	±	0.00535796	0.58371	±	0.00515737	0.593626	±	0.00669291	0.573794	±	0.00641139	NS	+	+	NS	NS	NS
	DI	5.46883	±	0.221616	5.98623	±	0.306479	5.13958	±	0.269972	5.09189	±	0.188113	5.27356	±	0.298465	4.91022	±	0.230533	NS	+	NS	NS	NS	NS
	DN3	0.0208267	±	0.000483721	0.020147	±	0.000904828	0.0212591	±	0.000538712	0.0220994	±	0.000338337	0.0220691	±	0.000398454	0.0221296	±	0.000575818	*	NS	NS	+	NS	NS
	DN6	0.00680297	±	0.000271302	0.00616374	±	0.000348945	0.00720975	±	0.000340167	0.00845076	±	0.000311286	0.00830751	±	0.000457117	0.00859401	±	0.000447731	***	+	NS	**	*	NS
	SFA = sum of saturated fatty acids; MUFA = sum o monounsaturated fatty acids; PUFA = sum of polyunsaturated fatty acids; UI = unsaturation index; D9 = activity of ∆9 desaturase activity; DI = desaturation index; DN3 total activity of the desaturases of n3; DN6 = total activity of the desaturases of n6; F= female; M = male; +:p <0.1;*:p <0.05;**p <0.01;***p <0.001; NS = non-significant

## Sheet: S7
	Table S7. Differences in fatty acid composition (g/100g ± S.E.M.) and desaturase activity in the neutral fraction of the longissimus dorsi muscle between piglets born from sows treated or not with hydroxytyrosol and linseed oil during pregnancy (groups T and C, respectively) at 60 days-old
		Control									Treated									P value
		Total			Females			Males			Total			Females			Males			Total	F vs M		C vs T		Treatment* Sex
																					C	T	F	M
	C14:0	1.26034	±	0.033031	1.28537	±	0.0302085	1.24441	±	0.0511998	1.26768	±	0.0312708	1.26506	±	0.0284859	1.26971	±	0.0527733	NS	NS	NS	NS	NS	NS
	C16:0	23.9389	±	0.311979	24.0997	±	0.545214	23.8365	±	0.393147	23.7346	±	0.259816	24.0071	±	0.241737	23.5226	±	0.422004	NS	NS	NS	NS	NS	+
	C16:1n9	0.573847	±	0.0386177	0.646769	±	0.0527117	0.527441	±	0.0503385	0.531921	±	0.0355848	0.473725	±	0.0301325	0.577185	±	0.0557306	NS	NS	NS	*	NS	NS
	C16:1n7	3.46785	±	0.105825	3.54807	±	0.157388	3.4168	±	0.145001	3.37333	±	0.123317	3.64176	±	0.114117	3.16455	±	0.175041	NS	NS	+	NS	NS	NS
	C17:0	0.478935	±	0.0364089	0.528158	±	0.045427	0.447611	±	0.0514527	0.407365	±	0.0268094	0.390766	±	0.0436656	0.420276	±	0.0351561	NS	NS	NS	+	NS	NS
	C17:1	0.418665	±	0.0260355	0.439969	±	0.0189981	0.405108	±	0.0412381	0.376417	±	0.0177685	0.378346	±	0.0330191	0.374917	±	0.0203905	NS	NS	NS	NS	NS	NS
	C18:0	9.63443	±	0.198161	9.44511	±	0.26004	9.75491	±	0.282284	9.87249	±	0.317683	9.90622	±	0.273494	9.84626	±	0.540906	NS	NS	NS	NS	NS	NS
	C18:1n9	37.113	±	0.959123	37.1455	±	1.22194	37.0923	±	1.41026	38.9544	±	0.558882	39.5323	±	0.453499	38.5049	±	0.929235	NS	NS	NS	NS	NS	NS
	C18:1n7	3.22437	±	0.248309	3.05081	±	0.170495	3.05081	±	0.410845	2.97858	±	0.114437	3.14302	±	0.185588	2.85069	±	0.137432	NS	NS	NS	NS	NS	NS
	C18:2n6	15.6203	±	0.695775	16.2751	±	1.47457	15.2036	±	0.686895	15.1515	±	0.628489	14.037	±	0.473287	16.0183	±	0.985559	NS	NS	NS	NS	NS	NS
	C18:3n6	0.0938977	±	0.00616699	0.106415	±	0.00408956	0.0859323	±	0.00911574	0.0863953	±	0.00678618	0.0811917	±	0.00648385	0.0904425	±	0.0111492	NS	NS	NS	**	NS	NS
	C18:3n3	1.20634	±	0.0533982	1.23167	±	0.103334	1.19023	±	0.0615482	1.24303	±	0.0545209	1.17533	±	0.0483052	1.29569	±	0.0880633	NS	NS	NS	NS	NS	NS
	C18:4n3	0.109976	±	0.00819492	0.123169	±	0.00772118	0.10158	±	0.0120801	0.112039	±	0.00767701	0.116979	±	0.00988692	0.108196	±	0.0116282	NS	NS	NS	NS	NS	NS
	C20:1n9	0.658417	±	0.0126781	0.645059	±	0.0151954	0.666917	±	0.0184498	0.653153	±	0.0120704	0.628032	±	0.0165744	0.672692	±	0.0147079	NS	NS	+	NS	NS	NS
	C20:3n6	0.179144	±	0.0122553	0.19917	±	0.0166159	0.1664	±	0.0164509	0.165416	±	0.00721352	0.153523	±	0.00936988	0.174666	±	0.0098889	NS	NS	NS	*	NS	NS
	C20:4n6	0.477822	±	0.0484319	0.566579	±	0.0674664	0.421341	±	0.0629835	0.503136	±	0.0680617	0.508534	±	0.0958041	0.498937	±	0.10041	NS	NS	NS	NS	NS	NS
	C20:5n3	0.0465454	±	0.00684279	0.0374553	±	0.00657475	0.05233	±	0.0102541	0.0574586	±	0.0146825	0.0450896	±	0.00645425	0.067079	±	0.0258426	NS	NS	NS	NS	NS	NS
	C22:4n6	0.213552	±	0.0236336	0.244137	±	0.023406	0.194089	±	0.0353157	0.190002	±	0.0206721	0.187239	±	0.0411993	0.192151	±	0.0208084	NS	NS	NS	NS	NS	NS
	C22:5n3	0.209047	±	0.0159796	0.252306	±	0.0225826	0.181518	±	0.0179092	0.216613	±	0.0176918	0.199014	±	0.0184709	0.230302	±	0.0281209	NS	*	NS	+	NS	NS
	C22:6n3	0.108688	±	0.00921837	0.129422	±	0.0105454	0.0954944	±	0.0122135	0.124556	±	0.010092	0.129784	±	0.0107785	0.12049	±	0.0163402	NS	+	NS	NS	NS	NS
	SFA	35.3126	±	0.451412	35.3584	±	0.721235	35.2834	±	0.606651	35.2821	±	0.523745	35.5692	±	0.512428	35.0588	±	0.86426	NS	NS	NS	NS	NS	NS
	MUFA	42.9542	±	0.629663	41.9281	±	1.33257	43.6072	±	0.561489	43.4945	±	0.543717	44.1554	±	0.400161	42.9804	±	0.903615	NS	NS	NS	NS	NS	NS
	PUFA	18.1566	±	0.768684	19.036	±	1.65727	17.597	±	0.717289	17.7256	±	0.696241	16.5039	±	0.467382	18.6757	±	1.10926	NS	NS	NS	NS	NS	NS
	UI	0.872364	±	0.0119151	0.885991	±	0.0242802	0.863692	±	0.0122681	0.869936	±	0.0108239	0.853515	±	0.00762578	0.882708	±	0.0176066	NS	NS	NS	NS	NS	NS
	MUFA/SFA	1.22005	±	0.0245746	1.1881	±	0.0417082	1.24038	±	0.0301577	1.23781	±	0.0270519	1.24348	±	0.0258816	1.2334	±	0.0452	NS	NS	NS	NS	NS	NS
	∑n3	1.6806	±	0.0668913	1.77403	±	0.131373	1.62115	±	0.0703454	1.7537	±	0.0655741	1.6662	±	0.0432483	1.82175	±	0.109174	NS	NS	NS	NS	NS	NS
	∑n6	16.5847	±	0.708778	17.3914	±	1.53391	16.0714	±	0.656776	16.0964	±	0.630359	14.9675	±	0.432066	16.9745	±	0.997665	NS	NS	NS	NS	NS	NS
	∑n3/∑n6	9.86365	±	0.112304	9.74637	±	0.149676	9.93828	±	0.158426	9.17571	±	0.101987	8.98383	±	0.132951	9.32495	±	0.13415	***	NS	+	**	*	NS
	D9	0.250734	±	0.0381152	0.164501	±	0.00694409	0.30561	±	0.0569963	0.233917	±	0.0425422	0.337601	±	0.084141	0.153275	±	0.00669995	NS	*	+	+	*	*
	DI	4.31415	±	0.105769	4.26127	±	0.12382	4.3478	±	0.158037	4.32006	±	0.162226	4.33186	±	0.149192	4.31088	±	0.273343	NS	NS	NS	NS	NS	NS
	DN3	0.0407909	±	0.0068647	0.0312056	±	0.00542174	0.0468906	±	0.0105024	0.0457444	±	0.0101017	0.0396063	±	0.00725857	0.0505184	±	0.0174042	NS	NS	NS	NS	NS	NS
	DN6	0.0314045	±	0.0036625	0.0349774	±	0.00338529	0.0291309	±	0.00562229	0.0342975	±	0.00510204	0.0369703	±	0.00759421	0.0322186	±	0.00720365	NS	NS	NS	NS	NS	NS
	SFA = sum of saturated fatty acids; MUFA = sum o monounsaturated fatty acids; PUFA = sum of polyunsaturated fatty acids; UI = unsaturation index; D9 = activity of ∆9 desaturase activity; DI = desaturation index; DN3 total activity of the desaturases of n3; DN6 = total activity of the desaturases of n6; F= female; M = male; +:p <0.1;*:p <0.05;**p <0.01;***p <0.001; NS = non-significant

## Sheet: S8
	Table S8. Differences in fatty acid composition (g/100g ± S.E.M.) and desaturase activity in the polar fraction of the longissimus dorsi muscle between piglets born from sows treated or not with hydroxytyrosol and linseed oil during pregnancy (groups T and C, respectively) at 60 days-old
		Control									Treated									P value
		Total			Females			Males			Total			Females			Males			Total	F vs M		C vs T		Treatment* Sex
																					C	T	F	M
	C14:0	1.49006	±	0.105999	1.68422	±	0.170579	1.3665	±	0.127358	1.64254	±	0.130328	1.91698	±	0.166803	1.43671	±	0.161789	NS	NS	+	NS	NS	NS
	C16:0	23.3457	±	0.198912	23.4568	±	0.283364	23.2751	±	0.279505	23.1682	±	0.203988	23.4693	±	0.329547	22.9341	±	0.244317	NS	NS	NS	NS	NS	NS
	C16:1n9	0.675959	±	0.0652979	0.642922	±	0.0270389	0.701655	±	0.116609	0.474857	±	0.0225099	0.486033	±	0.0337744	0.465077	±	0.0318638	**	NS	NS	**	+	NS
	C16:1n7	1.07072	±	0.0511923	1.0987	±	0.0780154	1.05292	±	0.0698911	1.03112	±	0.0736943	1.12113	±	0.13385	0.961113	±	0.079067	NS	NS	NS	NS	NS	NS
	C17:0	0.914458	±	0.0545921	0.953654	±	0.0527807	0.889515	±	0.0840655	0.830937	±	0.0483583	0.831859	±	0.0830823	0.83022	±	0.061387	NS	NS	NS	NS	NS	NS
	C17:1	0.230598	±	0.0194156	0.203186	±	0.0230527	0.248043	±	0.0277037	0.215776	±	0.0236453	0.166684	±	0.0272164	0.253958	±	0.0318595	NS	NS	+	NS	NS	NS
	C18:0	12.3709	±	0.217136	12.195	±	0.335308	12.4829	±	0.29156	12.4681	±	0.23151	11.9021	±	0.299433	12.9083	±	0.266431	NS	NS	*	NS	NS	NS
	C18:1n9	10.8797	±	0.503899	9.72238	±	0.381009	11.6162	±	0.71515	9.92556	±	0.328191	9.31489	±	0.313187	10.4005	±	0.487195	NS	+	NS	NS	NS	NS
	C18:1n7	3.80695	±	0.12044	3.97746	±	0.144222	3.69844	±	0.171415	3.69398	±	0.106422	3.78814	±	0.169059	3.62076	±	0.139815	NS	NS	NS	NS	NS	NS
	C18:2n6	29.0783	±	0.35866	29.1169	±	0.575355	29.0536	±	0.480931	30.281	±	0.223128	30.3257	±	0.190358	30.2462	±	0.380091	**	NS	NS	+	+	NS
	C18:3n6	0.175887	±	0.0070851	0.164643	±	0.0153314	0.183042	±	0.00606066	0.1709	±	0.00784434	0.173504	±	0.011006	0.168876	±	0.0115447	NS	NS	NS	NS	NS	+
	C18:3n3	0.855846	±	0.0239811	0.821612	±	0.0164363	0.877631	±	0.0370758	0.819273	±	0.0295508	0.767839	±	0.0407809	0.859277	±	0.0385158	NS	NS	NS	NS	NS	NS
	C18:4n3	0.072244	±	0.00628924	0.0694867	±	0.00830778	0.0739986	±	0.00910434	0.0637712	±	0.0081911	0.0466668	±	0.00390573	0.0770746	±	0.0128134	NS	NS	*	*	NS	NS
	C20:1n9	0.276447	±	0.0154534	0.242361	±	0.00326897	0.298139	±	0.0232218	0.28306	±	0.0163905	0.259722	±	0.00912252	0.301211	±	0.0274374	NS	*	NS	NS	NS	NS
	C20:3n6	0.567595	±	0.0170767	0.595917	±	0.0215565	0.549572	±	0.0234577	0.587246	±	0.0228242	0.594178	±	0.0301896	0.581855	±	0.0345906	NS	NS	NS	NS	NS	NS
	C20:4n6	9.27844	±	0.239925	9.89641	±	0.326828	8.88519	±	0.282103	9.3602	±	0.376757	9.76774	±	0.600649	9.04322	±	0.483726	NS	*	NS	NS	NS	NS
	C20:5n3	0.724313	±	0.0174314	0.729437	±	0.0236934	0.721052	±	0.0250637	0.777741	±	0.0217413	0.820261	±	0.0345901	0.74467	±	0.0237737	+	NS	+	+	NS	NS
	C22:4n6	1.41363	±	0.0417353	1.48077	±	0.0476351	1.3709	±	0.0592425	1.38279	±	0.0416679	1.3898	±	0.0643331	1.37733	±	0.0580053	NS	NS	NS	NS	NS	NS
	C22:5n3	1.55871	±	0.058355	1.6907	±	0.0796983	1.47471	±	0.0723431	1.70893	±	0.04663	1.78238	±	0.0629754	1.6518	±	0.0632614	+	+	NS	NS	+	NS
	C22:6n3	1.18018	±	0.0392436	1.25745	±	0.0837647	1.13101	±	0.0313586	1.2612	±	0.0607956	1.29749	±	0.0806412	1.23297	±	0.0911005	NS	NS	NS	NS	NS	+
	SFA	38.1212	±	0.290904	38.2897	±	0.239096	38.014	±	0.458943	37.9045	±	0.282435	37.8464	±	0.468492	37.9498	±	0.370514	NS	NS	NS	NS	NS	NS
	MUFA	16.2644	±	0.491037	15.2441	±	0.246882	16.9137	±	0.734207	15.1495	±	0.332085	14.6506	±	0.420922	15.5376	±	0.470343	+	+	NS	NS	NS	NS
	PUFA	43.7249	±	0.454368	44.5659	±	0.38094	43.1897	±	0.518718	45.1518	±	0.378306	45.6681	±	0.603919	44.7503	±	0.655247	*	+	NS	NS	+	NS
	UI	1.41373	±	0.010029	1.44299	±	0.0116383	1.39511	±	0.0117863	1.44116	±	0.0171906	1.4601	±	0.0262602	1.42644	±	0.0228222	NS	*	NS	NS	NS	NS
	MUFA/SFA	0.428437	±	0.016448	0.398216	±	0.00687101	0.447667	±	0.0252876	0.399763	±	0.00858016	0.38731	±	0.0116785	0.409449	±	0.0117912	NS	+	NS	NS	NS	NS
	∑n3	4.39129	±	0.0839276	4.56869	±	0.135429	4.2784	±	0.0965129	4.63091	±	0.0877144	4.71464	±	0.142829	4.5658	±	0.111957	NS	+	NS	NS	+	NS
	∑n6	40.5138	±	0.369656	41.2546	±	0.351226	40.0424	±	0.525232	41.7821	±	0.448198	42.2509	±	0.599425	41.4175	±	0.649628	*	+	NS	NS	NS	NS
	∑n3/∑n6	9.28587	±	0.202376	9.08505	±	0.319794	9.41366	±	0.265867	9.06082	±	0.161927	9.00423	±	0.261284	9.10484	±	0.216849	NS	NS	NS	NS	NS	NS
	D9	0.109916	±	0.004229	0.114733	±	0.00322369	0.106851	±	0.00658543	0.104111	±	0.00325248	0.107825	±	0.00423381	0.101222	±	0.00473512	NS	NS	NS	NS	NS	NS
	DI	1.19926	±	0.0552498	1.12888	±	0.040566	1.24405	±	0.0857176	1.09678	±	0.0289101	1.10715	±	0.0495236	1.08872	±	0.0365616	NS	NS	NS	NS	NS	NS
	DN3	0.859636	±	0.0356103	0.887602	±	0.0209859	0.841839	±	0.0572539	0.982114	±	0.06672	1.10281	±	0.115867	0.888243	±	0.0670037	NS	NS	NS	+	NS	NS
	DN6	0.320579	±	0.0105005	0.341806	±	0.0174502	0.30707	±	0.0119807	0.309518	±	0.0130595	0.322393	±	0.0204578	0.299504	±	0.0171963	NS	NS	NS	NS	NS	NS
	SFA = sum of saturated fatty acids; MUFA = sum o monounsaturated fatty acids; PUFA = sum of polyunsaturated fatty acids; UI = unsaturation index; D9 = activity of ∆9 desaturase activity; DI = desaturation index; DN3 total activity of the desaturases of n3; DN6 = total activity of the desaturases of n6; F= female; M = male; +:p <0.1;*:p <0.05;**p <0.01;***p <0.001; NS = non-significant

## Sheet: S9
	Table S9. Differences in fatty acid composition (g/100g ± S.E.M.) and desaturase activity in the neutral fraction of the biceps femoris muscle between piglets born from sows treated or not with hydroxytyrosol and linseed oil during pregnancy (groups T and C, respectively) at 60 days-old
		Control									Treated									P value
		Total			Females			Males			Total			Females			Males			Total	F vs M		C vs T		Treatment* Sex
																					C	T	F	M
	C14:0	1.08903	±	0.027929	1.0992	±	0.041178	1.08256	±	0.0388809	1.09307	±	0.027925	1.10529	±	0.0302566	1.0822	±	0.0469313	NS	NS	NS	NS	NS	NS
	C16:0	22.6469	±	0.338503	22.7974	±	0.672269	22.5512	±	0.379258	22.7521	±	0.254431	22.9847	±	0.263658	22.5453	±	0.423241	NS	NS	NS	NS	NS	NS
	C16:1n9	3.0603	±	0.175788	3.02356	±	0.264578	3.08368	±	0.243093	2.85512	±	0.123498	2.90386	±	0.150991	2.81179	±	0.198463	NS	NS	NS	NS	NS	NS
	C16:1n7	0.511437	±	0.0245724	0.524074	±	0.0294202	0.503396	±	0.0365043	0.473656	±	0.0160057	0.489304	±	0.0292962	0.459747	±	0.0157756	NS	NS	NS	NS	NS	NS
	C17:0	0.546369	±	0.0405055	0.566624	±	0.0579917	0.53348	±	0.0568975	0.462497	±	0.0303596	0.43816	±	0.0457278	0.48413	±	0.0416092	NS	NS	NS	NS	NS	NS
	C17:1	0.391013	±	0.0231804	0.409171	±	0.0241997	0.379459	±	0.0351685	0.364222	±	0.0197101	0.355404	±	0.0291898	0.372061	±	0.0280821	NS	NS	NS	NS	NS	NS
	C18:0	10.1592	±	0.280108	9.83855	±	0.438851	10.3633	±	0.366086	10.1095	±	0.265163	9.96916	±	0.279599	10.2342	±	0.447978	NS	NS	NS	NS	NS	NS
	C18:1n9	33.0716	±	1.1414	32.6459	±	2.04604	33.3426	±	1.41664	35.1227	±	1.08685	36.0143	±	1.51159	34.3301	±	1.58696	NS	NS	NS	NS	NS	NS
	C18:1n7	3.04658	±	0.0650748	3.39385	±	0.086619	3.0203	±	0.162996	4.91093	±	0.0650748	3.07614	±	0.0756135	6.54185	±	0.106619	NS	NS	NS	*	NS	NS
	C18:2n6	19.4962	±	0.699728	19.9505	±	1.30433	19.2071	±	0.83124	18.6812	±	0.739356	17.9984	±	1.00634	19.2882	±	1.08609	NS	NS	NS	NS	NS	NS
	C18:3n6	0.0879617	±	0.00370469	0.0923894	±	0.00655354	0.0851441	±	0.00444293	0.0803053	±	0.00497175	0.0785162	±	0.00917024	0.0818957	±	0.00522518	NS	NS	NS	NS	NS	NS
	C18:3n3	1.21514	±	0.0340461	1.26713	±	0.0410028	1.18205	±	0.0479691	1.29656	±	0.0283607	1.28711	±	0.0376566	1.30496	±	0.0437827	+	NS	NS	NS	+	NS
	C18:4n3	0.082892	±	0.00356535	0.0879361	±	0.004232	0.0796821	±	0.00508664	0.0797695	±	0.00307005	0.0820281	±	0.00277444	0.0777618	±	0.0053431	NS	NS	NS	NS	NS	+
	C20:1n9	0.573604	±	0.0168117	0.551089	±	0.0179196	0.587931	±	0.0247152	0.581338	±	0.0175284	0.573257	±	0.0257054	0.588521	±	0.0251608	NS	NS	NS	NS	NS	NS
	C20:3n6	0.392462	±	0.0448696	0.469863	±	0.104688	0.343206	±	0.0281461	0.321942	±	0.0206615	0.299195	±	0.0253058	0.342162	±	0.0317184	NS	NS	NS	NS	NS	NS
	C20:4n6	2.13167	±	0.264101	2.0811	±	0.414575	2.16386	±	0.357965	1.6175	±	0.279066	1.40908	±	0.418226	1.80277	±	0.386061	NS	NS	NS	NS	NS	NS
	C20:5n3	0.111113	±	0.0131409	0.109514	±	0.0232582	0.11213	±	0.0165399	0.096929	±	0.0163301	0.0861373	±	0.0213992	0.106522	±	0.0250365	NS	NS	NS	NS	NS	NS
	C22:4n6	0.370621	±	0.0331031	0.366334	±	0.0540763	0.37335	±	0.0439309	0.301547	±	0.0383036	0.257707	±	0.0449357	0.340515	±	0.0597391	NS	NS	NS	NS	NS	NS
	C22:5n3	0.439607	±	0.0433178	0.468264	±	0.0744798	0.421371	±	0.0549213	0.378795	±	0.0432252	0.3372	±	0.0580156	0.415768	±	0.0638554	NS	NS	NS	NS	NS	NS
	C22:6n3	0.277969	±	0.0297608	0.257655	±	0.0602938	0.290896	±	0.032138	0.285117	±	0.0345611	0.255053	±	0.0465467	0.311841	±	0.0513576	NS	NS	NS	NS	NS	NS
	SFA	34.4416	±	0.563923	34.3017	±	1.04722	34.5306	±	0.681083	34.4171	±	0.383141	34.4973	±	0.35191	34.3459	±	0.675941	NS	NS	NS	NS	NS	NS
	MUFA	37.8925	±	1.14152	37.5241	±	2.12247	38.127	±	1.37503	39.588	±	1.09813	40.5084	±	1.47574	38.7699	±	1.63827	NS	NS	NS	NS	NS	NS
	PUFA	24.3276	±	1.04697	24.893	±	1.89296	23.9679	±	1.28367	22.8546	±	1.10548	21.8354	±	1.54217	23.7605	±	1.59655	NS	NS	NS	NS	NS	NS
	UI	0.99794	±	0.0186255	1.00513	±	0.0322117	0.993364	±	0.0237378	0.969866	±	0.0207589	0.950458	±	0.0296984	0.987118	±	0.0293754	NS	NS	NS	NS	NS	NS
	MUFA/SFA	1.11039	±	0.046789	1.10562	±	0.0824508	1.11342	±	0.0590928	1.15432	±	0.0379662	1.17524	±	0.045377	1.13572	±	0.0612537	NS	NS	NS	NS	NS	NS
	∑n3	2.12672	±	0.082261	2.1905	±	0.151165	2.08613	±	0.0983648	2.13717	±	0.0843193	2.04753	±	0.121803	2.21686	±	0.116762	NS	NS	NS	NS	NS	NS
	∑n6	22.4789	±	0.992568	22.9601	±	1.78726	22.1726	±	1.22346	21.0025	±	1.05639	20.0429	±	1.46932	21.8555	±	1.53082	NS	NS	NS	NS	NS	NS
	∑n3/∑n6	10.5508	±	0.188082	10.4555	±	0.276457	10.6115	±	0.261299	9.77705	±	0.146475	9.76083	±	0.194617	9.79147	±	0.227019	*	NS	NS	+	*	NS
	D9	0.105358	±	0.00273637	0.10771	±	0.00390122	0.10386	±	0.00380029	0.122428	±	0.0251605	0.0976742	±	0.00215222	0.144431	±	0.0475324	NS	NS	NS	*	NS	NS
	DI	3.67645	±	0.21676	3.7503	±	0.356919	3.62945	±	0.285473	3.84857	±	0.188132	3.95651	±	0.219719	3.75262	±	0.306129	NS	NS	NS	NS	NS	NS
	DN3	0.089233	±	0.0112819	0.0862766	±	0.0182746	0.0913025	±	0.0150887	0.0805641	±	0.0151712	0.0681571	±	0.0184024	0.0929711	±	0.0245722	NS	NS	NS	NS	NS	NS
	DN6	0.109314	±	0.00977281	0.0989337	±	0.0153782	0.116581	±	0.0128077	0.0861518	±	0.0114805	0.0776571	±	0.0175325	0.0935847	±	0.0157098	NS	NS	NS	NS	NS	NS
	SFA = sum of saturated fatty acids; MUFA = sum o monounsaturated fatty acids; PUFA = sum of polyunsaturated fatty acids; UI = unsaturation index; D9 = activity of ∆9 desaturase activity; DI = desaturation index; DN3 total activity of the desaturases of n3; DN6 = total activity of the desaturases of n6; F= female; M = male; +:p <0.1;*:p <0.05;**p <0.01;***p <0.001; NS = non-significant

[truncated: 12 more sheets: S10, S11, S12, S13, S14, S15, S16, S17, S18, S19, S20, S21]
